# Supplementary material for: Optimal anti-amyloid-beta therapy for Alzheimer’s disease via a personalized mathematical model
Source: PubMed Central journal article supplement (PMC9477429; doi:10.1371/journal.pcbi.1010481), 2022-09-02
Supplement: pcbi.1010481.s003.pdf [file pcbi.1010481.s003.pdf]

# Response to reviewer 1' comments

According to reviewer 1's minor suggestions, we have revised the manuscript and highlighted the changes in red color.

## 1 Reviewer 1

1. On page 2, line 39: remove the space after taupathology.  
On page 8, line 148: add a space after (6).

Answer: We have made these minor changes accordingly.

2. It seems that  $\lambda_{\tau A\beta}$  and  $\lambda_\tau$  refer to the same parameter. It is better to make it consistent across the manuscript.

Answer: Thanks for catching this. We use  $\lambda_\tau$  in the revised manuscript.
